# Supplementary material for: Orkambi® and amplifier co‐therapy improves function from a rare CFTR mutation in gene‐edited cells and patient tissue
Source: PubMed Central journal article supplement (PMC5582412; doi:10.15252/emmm.201607137), 2017-06-30
Supplement: EMMM-9-1224-s001.pdf [file EMMM-9-1224-s001.pdf]

## Expanded View Figures

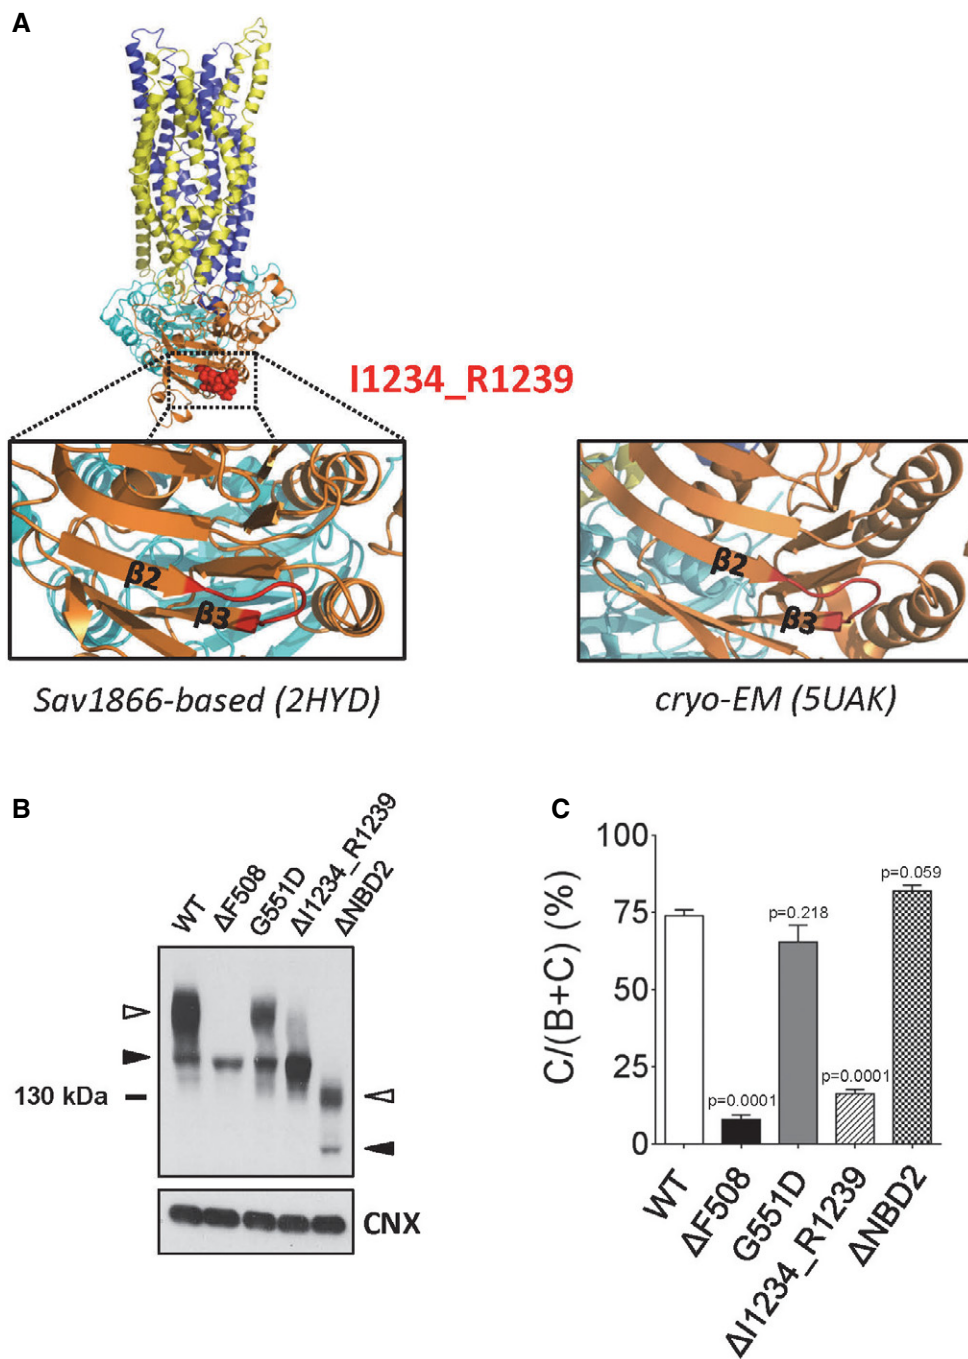

**Figure EV1. Location of I1234\_R1239 in the WT-CFTR homology model and relative protein expression levels between clinically relevant CFTR variants.**

**A** WT-CFTR homology model (left side; Dalton *et al*, 2012) showing the predicted secondary structure of I1234\_R1239 in the open-channel state, and the WT-CFTR cryo-electron microscopy-derived structure (right side; Liu *et al*, 2017) showing the secondary structure of I1234\_R1239 in the closed-channel state. MSD1, blue; NBD1, cyan; R-domain, omitted from model; MSD2, yellow; NBD2, orange; I1234\_R1239 sequence, red.

**B, C** Immunoblots (B) and quantitative analysis (C) showing steady-state expression levels of  $\Delta$ I1234\_R1239-CFTR and other CFTR mutants ( $\Delta$ F508-CFTR, G551D-CFTR,  $\Delta$ NBD2-CFTR). Band B, black arrowhead; band C, white arrowhead. Mean  $\pm$  SEM,  $n = 4$  biological replicates with statistical significance of difference relative to WT-CFTR indicated as  $P$ -values using unpaired  $t$ -tests.

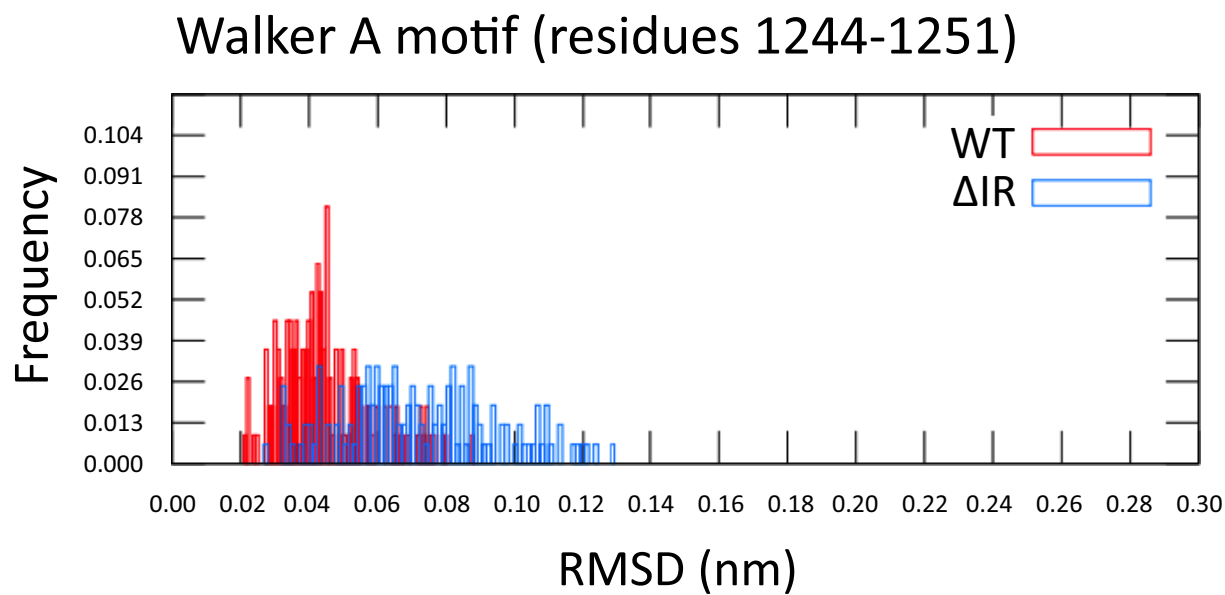

**Figure EV2. Structural heterogeneity of Walker A in WT- and  $\Delta$ I1234\_R1239-NBD2.**

Distribution of pairwise RMSDs for final states of the backbone atoms of the Walker A motif (residues 1,244–1,251) in WT-NBD2 (red) and  $\Delta$ I1234\_R1239-NBD2 (blue).

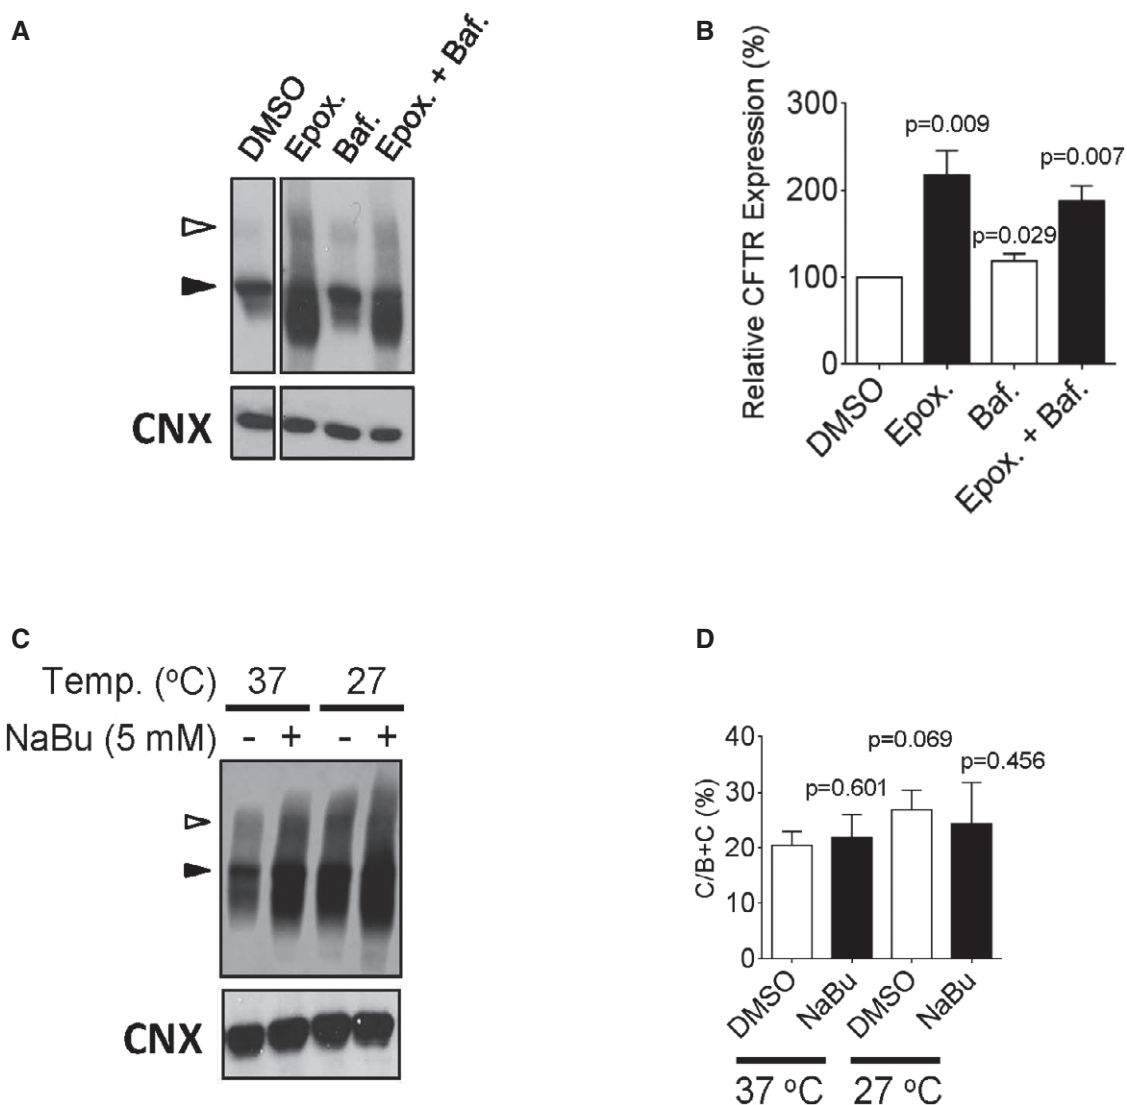

**Figure EV3.**  $\Delta I1234\_R1239$ -CFTR is degraded by the proteasome, and abundance, but not maturation is enhanced by a transcriptional modulator and low temperature incubation.

A, B Immunoblots (A) and quantitation (B) of  $\Delta I1234\_R1239$ -CFTR, transiently transfected into HEK-293 cells following treatments with epoxomicin (proteasome inhibitor) or bafilomycin A1 (lysosomal degradation inhibitor). Band B, black arrowhead; band C, white arrowhead. Mean  $\pm$  SEM,  $n = 3$  biological replicates with statistical significance of difference relative to DMSO indicated as  $P$ -values using unpaired  $t$ -tests.

C Immunoblots of  $\Delta I1234\_R1239$ -CFTR following treatments with sodium butyrate (NaBu, transcriptional modulator) or low temperature incubation (27°C). Band B, black arrowhead; band C, white arrowhead.

D Quantitation of  $\Delta I1234\_R1239$ -CFTR rescue % (band C/bands B + C) after low temperature and/or sodium butyrate (NaBu) treatment. Mean  $\pm$  SEM,  $n = 3$  biological replicates with statistical significance of difference relative to DMSO (37°C) indicated as  $P$ -values using unpaired  $t$ -tests.

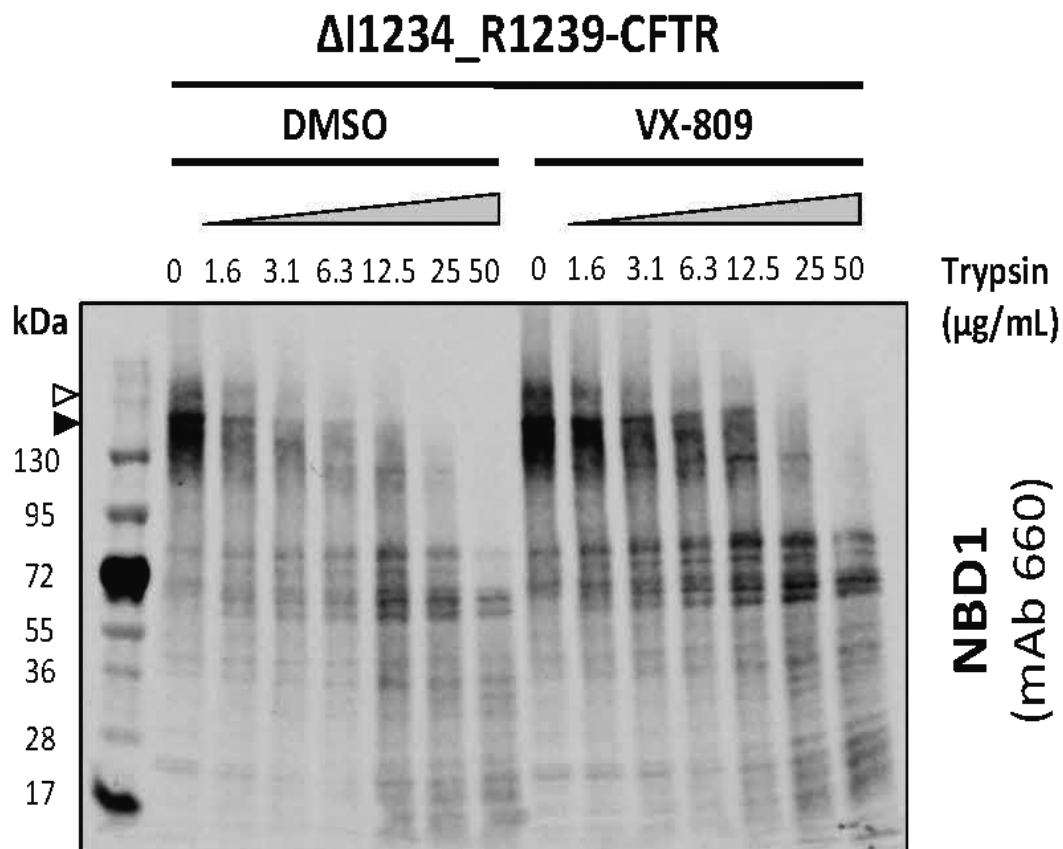

**Figure EV4.** Proteolytic digestion and probing of amino-terminal fragments of  $\Delta$ I1234\_R1239-CFTR in HEK-293 cells using mAb 660 in the absence (DMSO) or presence of VX-809.

The trypsin digestion profile of  $\Delta$ I1234\_R1239-CFTR as studied using anti-NBD1 mAb 660 is comparable to the profile using a distinct anti-NBD1 antibody: L12B4. Band B, black arrowhead; band C, white arrowhead.



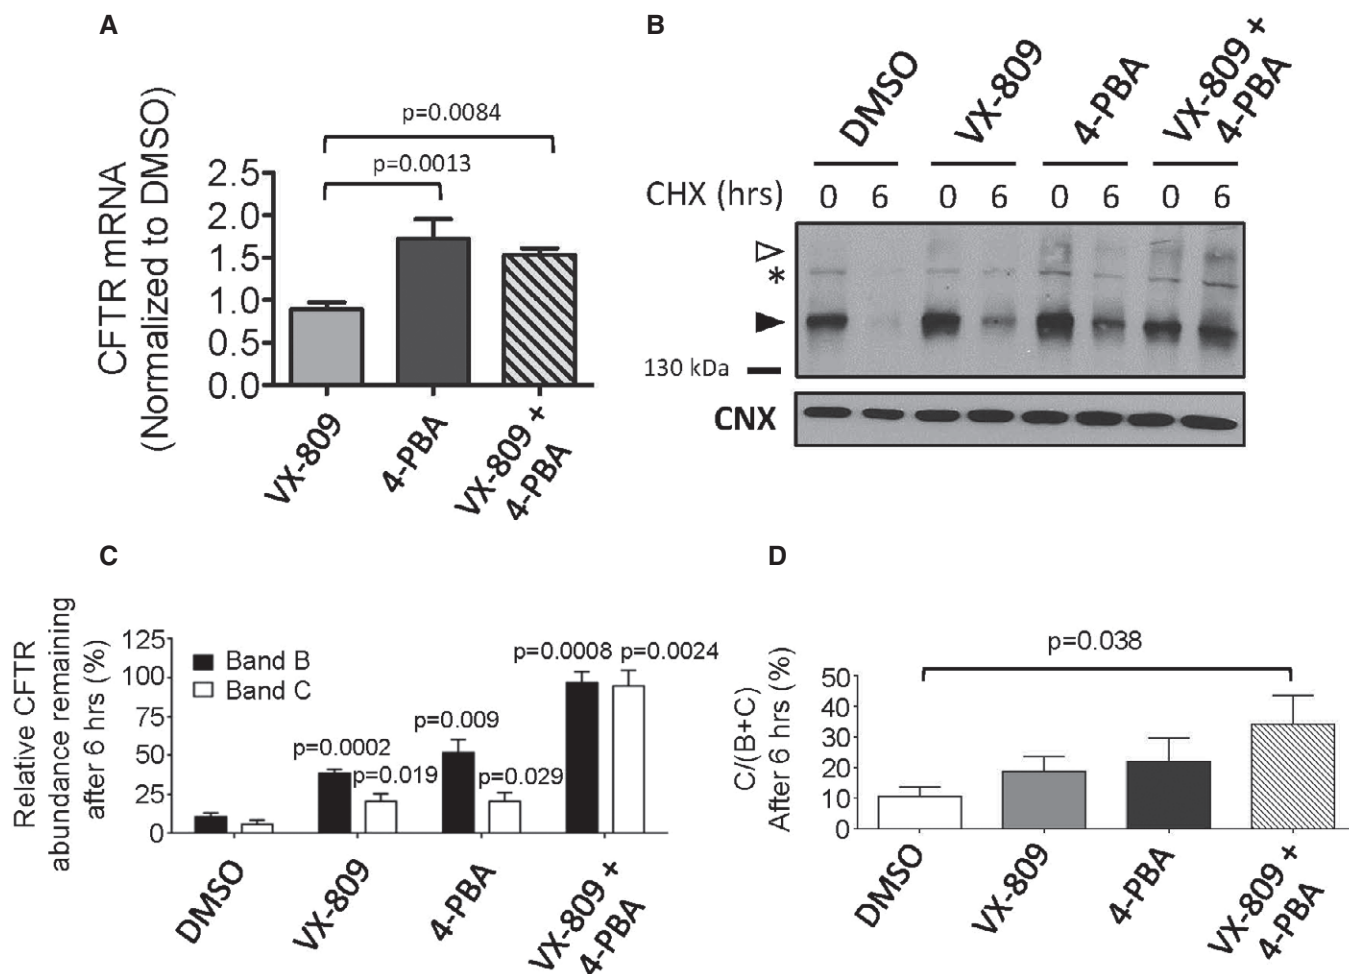

**Figure EV6.** VX-809 and 4-PBA lead to enhanced conformational maturation of  $\Delta I1234\_R1239$ -CFTR in a CRISPR/Cas9-edited cell line and in patient-derived nasal epithelial cells.

- A Quantitation of relative *CFTR* mRNA expression levels in HBE- $\Delta$ IR cells following pharmacological treatments. Mean  $\pm$  SEM,  $n = 3$  for each intervention and statistical significance tested using one-way ANOVA with Bonferroni's multiple comparisons test.
- B Immunoblot showing results of 6-h cycloheximide chase (to inhibit protein translation) after pre-treatment of CRISPR/Cas9-edited cell line bearing  $\Delta I1234\_R1239$ -CFTR with vehicle (DMSO), VX-809 (3  $\mu$ M), 4-PBA (1 mM), or VX-809 + 4-PBA. CNX was used as a loading control. Band B, black arrowhead; band C, white arrowhead; \*, non-specific mAb artifact.
- C Quantitation of expression of  $\Delta I1234\_R1239$ -CFTR in HBE cells following treatments with VX-809, transcriptional modulator (HDAC inhibitor) 4-phenylbutyrate (4-PBA), or VX-809 + 4-PBA before (0 h) or 6 h after cycloheximide (CHX) treatment. Mean  $\pm$  SEM,  $n = 3$  for each intervention and statistical significance of comparison to DMSO controls indicated above each bar. Statistical significance tested using two-way ANOVA with Tukey's multiple comparisons test.
- D Quantitation of mutant protein maturation (band C/bands B + C) after treatments described above. Mean  $\pm$  SEM,  $n = 3$  for each intervention and statistical significance of comparison to DMSO assessed using paired  $t$ -tests.

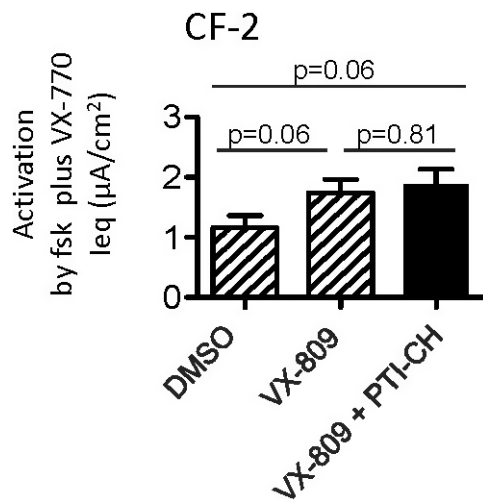

**Figure EV7. Summary of forskolin- and VX-770-dependent responses in Ussing chamber studies of nasal cultures from subject CF-2.**

Bars represent mean and SEM of five biological replicates (different nasal cell seedings). Statistical significance assessed using paired t-tests. The combination of VX-809 (3  $\mu\text{M}$ ) + PTI-CH (1  $\mu\text{M}$ ; black bar) did not enhance forskolin and VX-770 activated leq relative to VX-809 alone (hatched bar corresponding to primary nasal culture data shown in Fig 6E).
